# Supplementary material for: Transcriptome-wide signatures of tumor stage in kidney renal clear cell carcinoma: connecting copy number variation, methylation and transcription factor activity
Source: PubMed Central journal article supplement (PMC4293006; doi:10.1186/s13073-014-0117-z), 2014-12-11

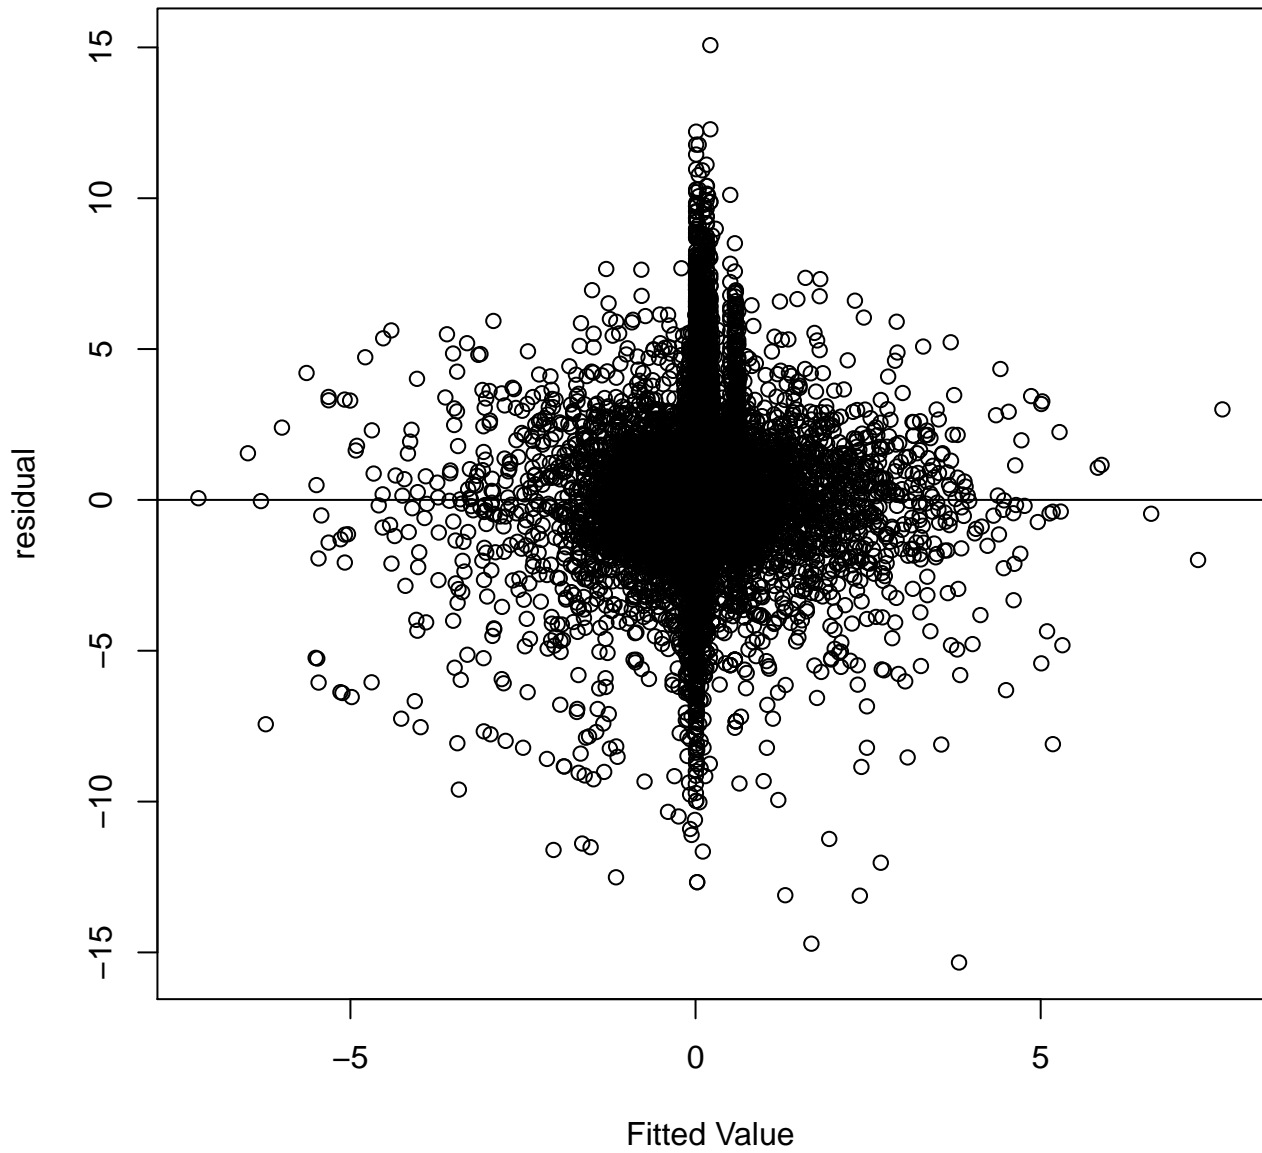

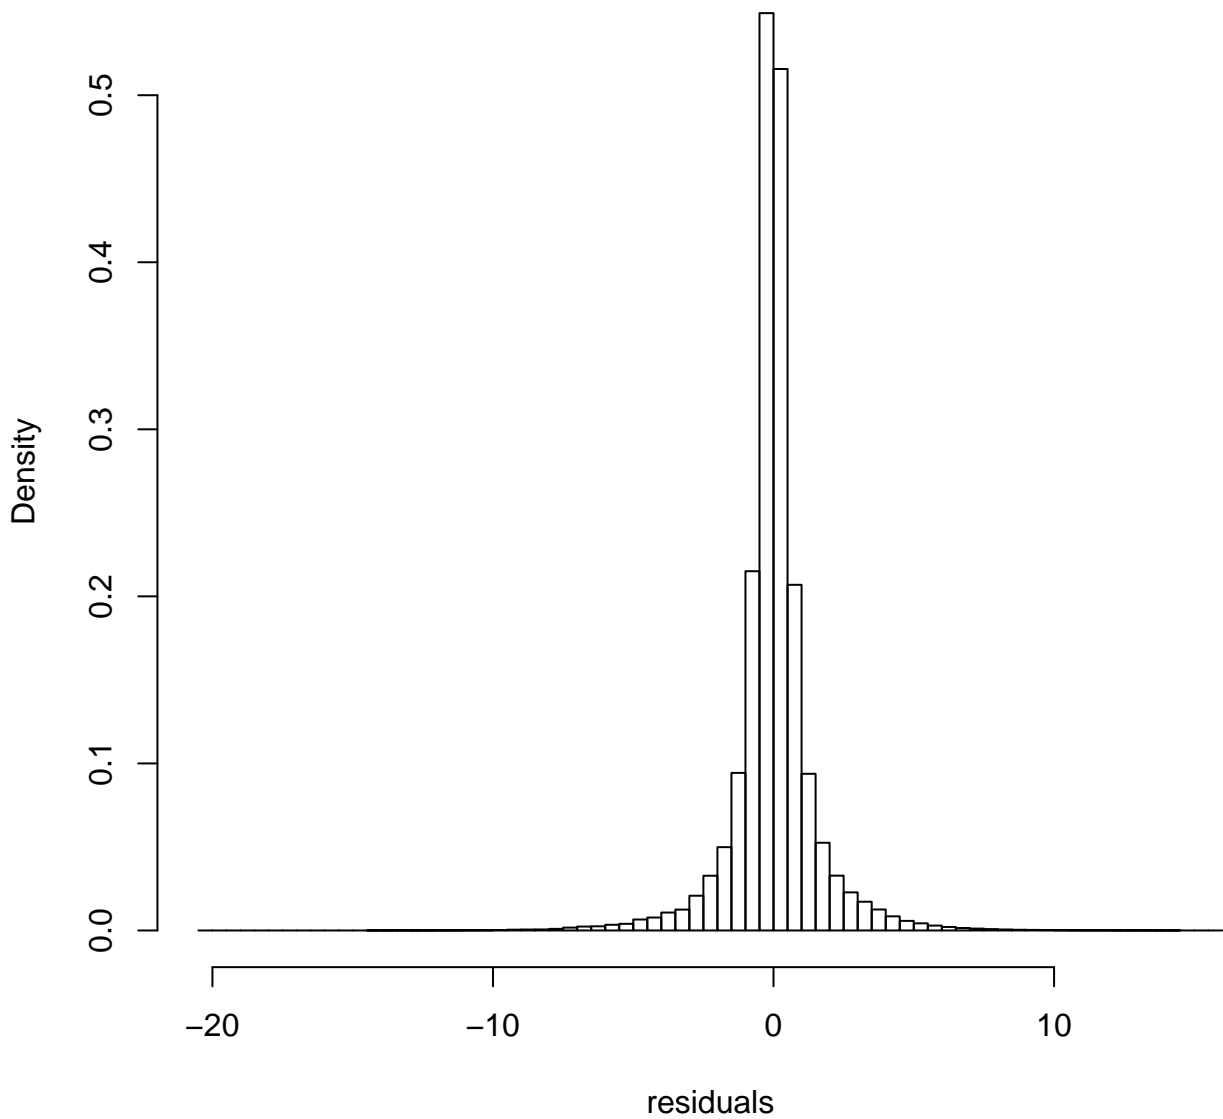

# Normal Q-Q Plot

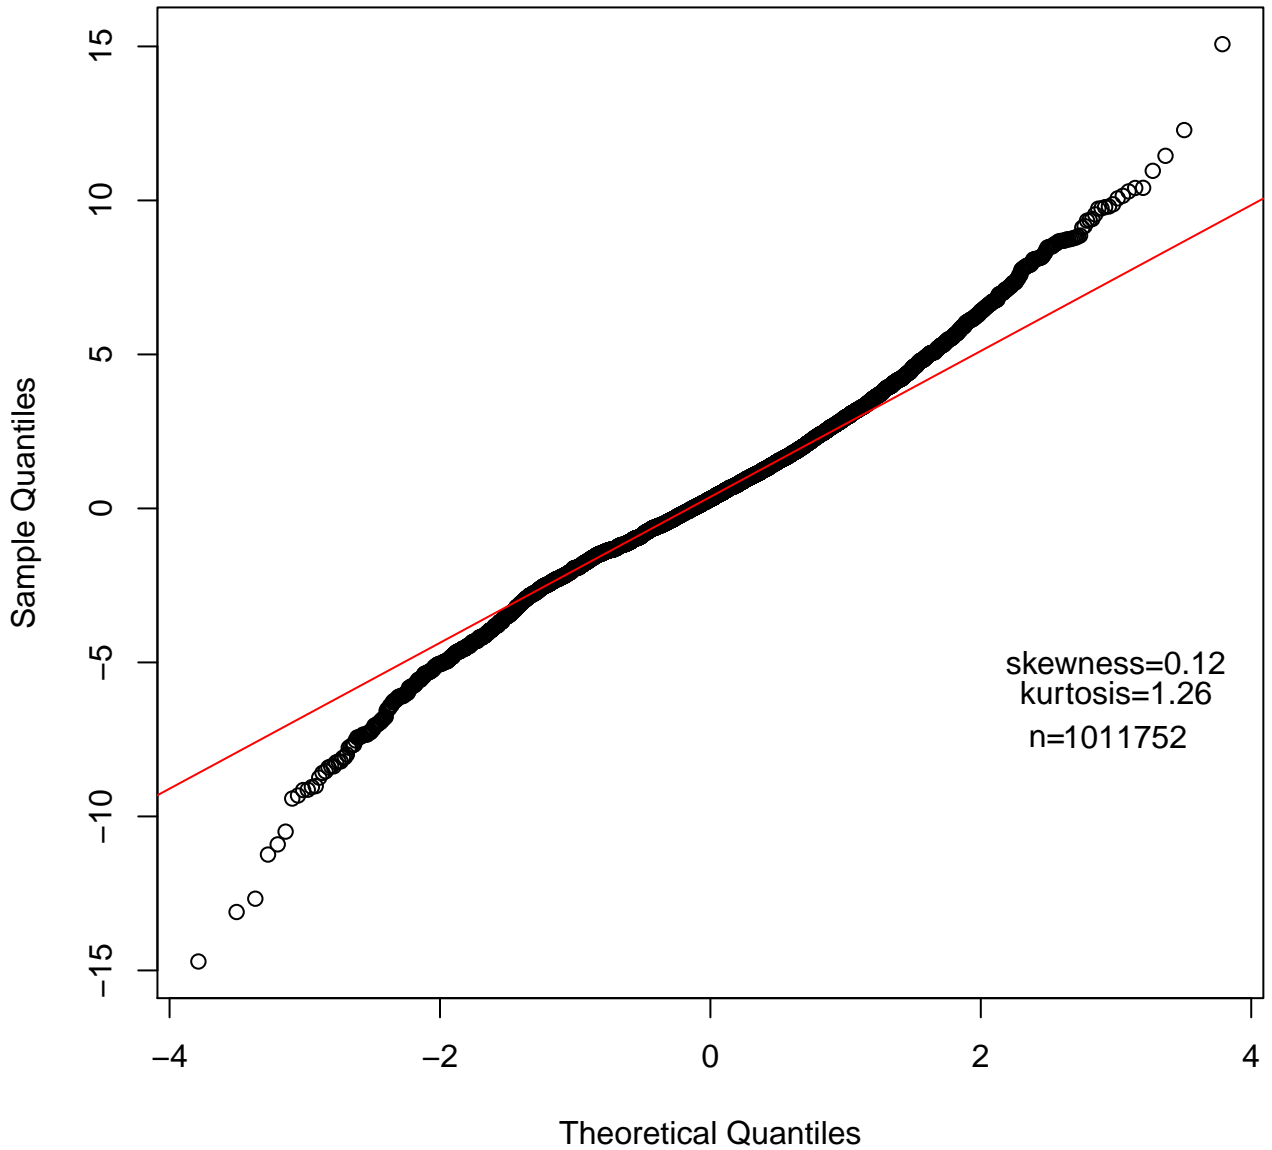

Supplement: 13073_2014_117_MOESM2_ESM.pdf [file 13073_2014_117_MOESM2_ESM.pdf]
