# Supplementary material for: Transcriptome-wide signatures of tumor stage in kidney renal clear cell carcinoma: connecting copy number variation, methylation and transcription factor activity
Source: PubMed Central journal article supplement (PMC4293006; doi:10.1186/s13073-014-0117-z), 2014-12-11
Supplement: 13073_2014_117_MOESM3_ESM.pdf [file 13073_2014_117_MOESM3_ESM.pdf]

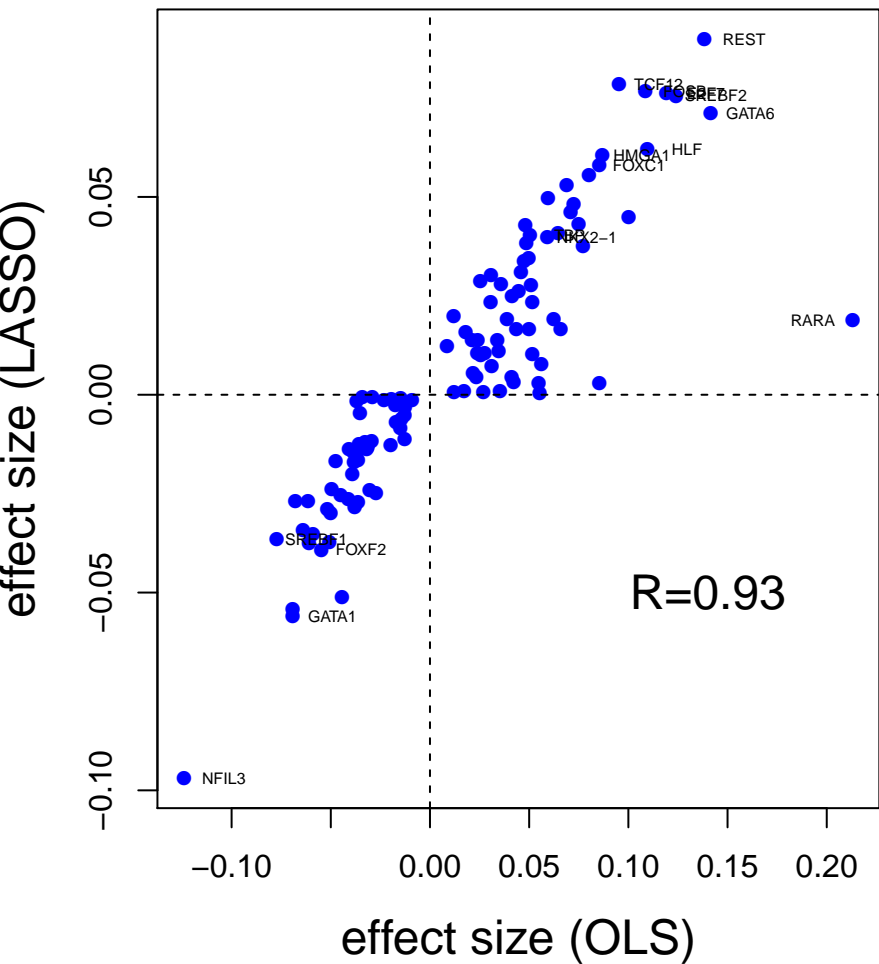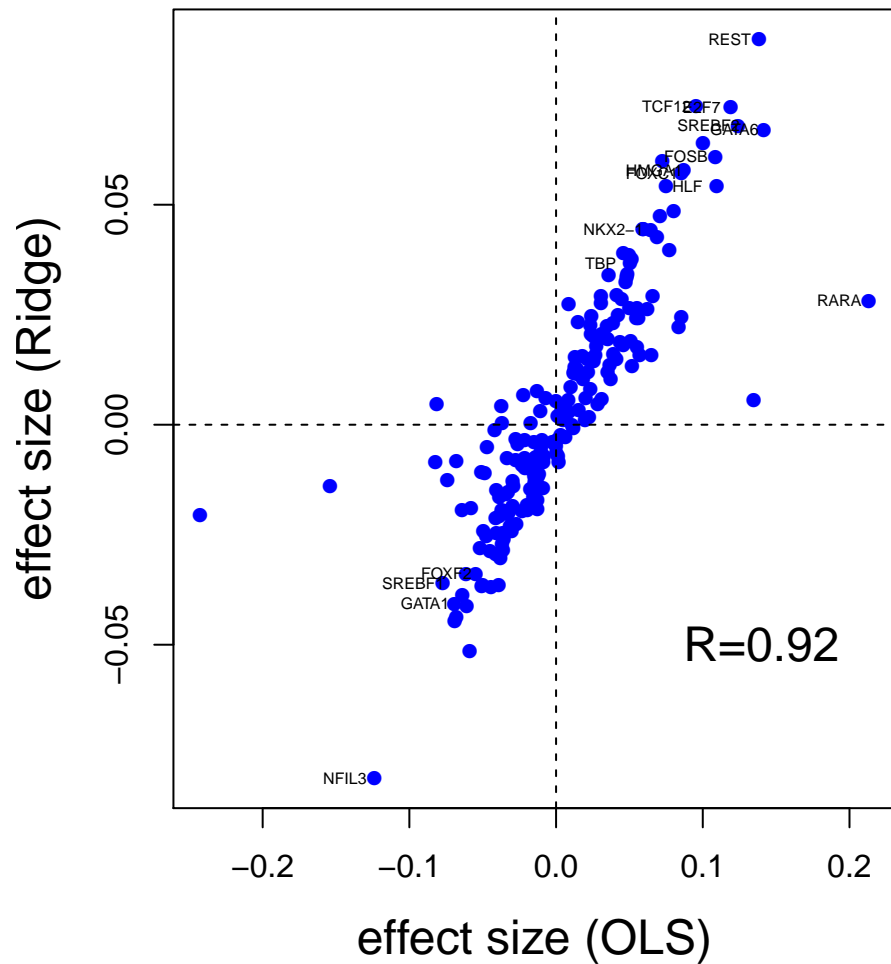

Effect sizes of the 16 TFs by our method (OLS), lasso and ridge regression

| Regulator           | OLS         | Lasso       |      | Ridge       |      |
|---------------------|-------------|-------------|------|-------------|------|
|                     | Effect size | Effect size | Rank | Effect size | Rank |
| GATA6               | 0.14        | 0.07        | 7    | 0.07        | 6    |
| NFIL3               | -0.12       | -0.10       | 1    | -0.08       | 2    |
| SREBF2              | 0.12        | 0.08        | 6    | 0.07        | 5    |
| SREBF1              | -0.08       | -0.04       | 30   | -0.04       | 35   |
| TBP                 | 0.05        | 0.04        | 23   | 0.04        | 31   |
| HLF                 | 0.11        | 0.06        | 8    | 0.05        | 12   |
| TCF12               | 0.10        | 0.08        | 3    | 0.07        | 3    |
| GATA1               | -0.07       | -0.06       | 11   | -0.04       | 24   |
| FOSB                | 0.10        | 0.08        | 4    | 0.07        | 8    |
| RARA/RARB/RARG/RXRB | 0.21        | 0.019       | 59   | 0.03        | 51   |
| REST                | 0.14        | 0.09        | 2    | 0.09        | 1    |
| FOXF2               | -0.05       | -0.04       | 25   | -0.03       | 39   |
| FOXC1               | 0.09        | 0.06        | 10   | 0.06        | 11   |
| HMG1                | 0.09        | 0.06        | 9    | 0.06        | 10   |
| E2F7                | 0.12        | 0.08        | 5    | 0.07        | 4    |
| NKX2-1              | 0.06        | 0.04        | 24   | 0.04        | 19   |
