# Supplementary material for: Transcriptome-wide signatures of tumor stage in kidney renal clear cell carcinoma: connecting copy number variation, methylation and transcription factor activity
Source: PubMed Central journal article supplement (PMC4293006; doi:10.1186/s13073-014-0117-z), 2014-12-11
Supplement: 13073_2014_117_MOESM8_ESM.pdf [file 13073_2014_117_MOESM8_ESM.pdf]

One-sided KS test between stage-dependent expression changes of TF targets and non-targets

| <b>Regulator</b> | <b>p-value</b> |
|------------------|----------------|
| <b>GATA6</b>     | 1.02E-06       |
| <b>NFIL3</b>     | 8.38E-07       |
| <b>SREBF2</b>    | 0.019502       |
| <b>SREBF1</b>    | 4.68E-06       |
| <b>TBP</b>       | 4.60E-12       |
| <b>HLF</b>       | 7.48E-07       |
| <b>TCF12</b>     | 0.879374       |
| <b>GATA1</b>     | 5.49E-10       |
| <b>FOSB</b>      | 0.00014        |
| <b>RARA</b>      | 2.04E-07       |
| <b>REST</b>      | 0.667569       |
| <b>FOXF2</b>     | 4.68E-10       |
| <b>FOXC1</b>     | 2.58E-05       |
| <b>HMGA1</b>     | 0.019388       |
| <b>E2F7</b>      | 0.069374       |
| <b>NKX2-1</b>    | 0.001666       |
